# Supplementary material for: Platinum Nanoparticle Extraction, Quantification, and Characterization in Sediments by Single-Particle Inductively Coupled Plasma Time-of-Flight Mass Spectrometry
Source: MDPI journal article supplement (doi:10.3390/nano12193307), 2022-09-23
Supplement: s1 [file s1]

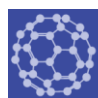

## Supplementary Materials

# Platinum Nanoparticle Extraction, Quantification, and Characterization in Sediments by Single-Particle Inductively Coupled Plasma Time-of-Flight Mass Spectrometry

Sara Taskula, Lucie Stetten, Frank von der Kammer \* and Thilo Hofmann \*

Department of Environmental Geosciences, Centre for Microbiology and Environmental Systems Science, University of Vienna, 1090 Vienna, Austria

\* Correspondence: frank.von.der.kammer@univie.ac.at (F.v.d.K.); thilo.hofmann@univie.ac.at (T.H.)

**Table S1.** Manufacturer data and measured values for the 50 nm Pt NPs (NanoComposix, USA).

|                                        | Manufacturer        |                       | Measured *                                    |
|----------------------------------------|---------------------|-----------------------|-----------------------------------------------|
|                                        | nm                  | 46                    | 40                                            |
| Diameter (TEM)                         | stdv ±              | 5                     | 6                                             |
| Mass concentration M                   | ng·ml <sup>-1</sup> | $53.0 \times 10^3$    | $26.1 \times 10^3 \pm 4.74 \times 10^3$       |
| Particle concentration C <sub>NP</sub> | NP·ml <sup>-1</sup> | $4.48 \times 10^{10}$ | $3.29 \times 10^{10} \pm 5.99 \times 10^9$    |
| Particle mass M/C <sub>NP</sub>        | fg                  | 1.18                  | $7.92 \times 10^{-1} \pm 2.39 \times 10^{-4}$ |

\*Mean value measured by spICP-TOF-MS.

**Table S2.** Summary of the samples measured in this study.

| Particle extraction procedure | Sample        | Total number of particles detected | Number of detected Pt NPs | Acquisition time | C <sub>NP</sub> (#·ml <sup>-1</sup> ) |     |
|-------------------------------|---------------|------------------------------------|---------------------------|------------------|---------------------------------------|-----|
| Physical one-step extraction  | LKSD-1        | Phys1-LKSD-UPW-1                   | 5579                      | 1                | 1 min                                 | 16  |
|                               |               | Phys1-LKSD-UPW-2                   | 5697                      | 3                | 1 min                                 | 49  |
|                               |               | Phys1-LKSD-FL70-1                  | 5425                      | 1                | 1 min                                 | 16  |
|                               |               | Phys1-LKSD-FL70-2                  | 5387                      | 0                | 1 min                                 | 0   |
|                               | Spiked LKSD-1 | Phys1-Spiked-LKSD-UPW-1            | 5602                      | 41               | 1 min                                 | 651 |
|                               |               | Phys1-Spiked-LKSD-UPW-2            | 4269                      | 40               | 1 min                                 | 635 |
|                               |               | Phys1-Spiked-LKSD-FL70-1           | 5331                      | 47               | 1 min                                 | 746 |
|                               |               | Phys1-Spiked-LKSD-FL70-2           | 5329                      | 51               | 1 min                                 | 810 |
| Physical two-step extraction  | LKSD-1        | Phys2-LKSD-UPW-1                   | 5963                      | 1                | 1 min                                 | 16  |
|                               |               | Phys2-LKSD-UPW-2                   | 5900                      | 1                | 1 min                                 | 16  |
|                               |               | Phys2-LKSD-FL70-1                  | 5786                      | 1                | 1 min                                 | 16  |
|                               |               | Phys2-LKSD-FL70-2                  | 5845                      | 2                | 1 min                                 | 32  |
|                               | Spiked LKSD-1 | Phys2-Spiked-LKSD-UPW-1            | 5923                      | 45               | 1 min                                 | 714 |

|                              |                       |                          |       |      |       |       |
|------------------------------|-----------------------|--------------------------|-------|------|-------|-------|
| Colloidal extraction         |                       | Phys2-Spiked-LKSD-UPW-2  | 4303  | 50   | 1 min | 794   |
|                              |                       | Phys2-Spiked-LKSD-FL70-1 | 5776  | 54   | 1 min | 857   |
|                              |                       | Phys2-Spiked-LKSD-FL70-2 | 4423  | 53   | 1 min | 841   |
|                              |                       |                          |       |      |       |       |
|                              | LKSD-1                | Coll-LKSD-UPW-1          | 12218 | 2    | 2 min | 32    |
|                              |                       | Coll-LKSD-UPW-2          | 12168 | 1    | 2 min | 16    |
|                              |                       | Coll-LKSD-FL70-1         | 11707 | 4    | 2 min | 64    |
|                              |                       | Coll-LKSD-FL70-2         | 11695 | 2    | 2 min | 32    |
|                              | Spiked LKSD-1         | Coll-Spiked-LKSD-UPW-1   | 6213  | 67   | 1 min | 1064  |
|                              |                       | Coll-Spiked-LKSD-UPW-2   | 4412  | 56   | 1 min | 889   |
|                              |                       | Coll-Spiked-LKSD-FL70-1  | 5970  | 72   | 1 min | 1143  |
|                              |                       | Coll-Spiked-LKSD-FL70-2  | 4433  | 51   | 1 min | 810   |
| Physical one-step extraction | LKSD-1                | LKSD-FL70-1              | 29823 | 42   | 5 min | 133   |
|                              |                       | LKSD-FL70-2              | 29512 | 48   | 5 min | 152   |
| Pt-Spiking solution          | Before centrifugation | Pt-solution-UPW-1        | 1597  | 1328 | 1 min | 21079 |
|                              |                       | Pt-solution-UPW-2        | 1554  | 1329 | 1 min | 21095 |
|                              | After centrifugation  | Pt-solution-cent-UPW-1   | 225   | 83   | 1 min | 1317  |
|                              |                       | Pt-solution-cent-UPW-2   | 264   | 72   | 1 min | 1143  |
| Blanks                       | Blank                 | Blank-UPW                | 89    | 0    | 1 min | –     |
|                              |                       | Blank-FL70               | 535   | 1    | 1 min | 16    |

### ICP-TOF-MS operational parameters

**Table S3.** ICP-TOF-MS operational parameters on the measurement day of each extraction procedure.

|                                                         | Colloidal Extraction                                                                                                         | Physical One-Step Extraction                                                                                                 | Physical Two-Step Extraction                                                                                                 |
|---------------------------------------------------------|------------------------------------------------------------------------------------------------------------------------------|------------------------------------------------------------------------------------------------------------------------------|------------------------------------------------------------------------------------------------------------------------------|
| Plasma power [W]                                        | 1550                                                                                                                         | 1550                                                                                                                         | 1550                                                                                                                         |
| Cooling gas flow [l·min <sup>-1</sup> ]                 | 14                                                                                                                           | 14                                                                                                                           | 14                                                                                                                           |
| Auxiliary gas flow [l·min <sup>-1</sup> ]               | 0.8                                                                                                                          | 0.8                                                                                                                          | 0.8                                                                                                                          |
| Nebulizer flow [l·min <sup>-1</sup> ]                   | 1.30                                                                                                                         | 1.43                                                                                                                         | 1.43                                                                                                                         |
| Sample flow rate [μl·min <sup>-1</sup> ]                | 300                                                                                                                          | 300                                                                                                                          | 300                                                                                                                          |
| TOF repetition rate [kHz]                               | 22                                                                                                                           | 22                                                                                                                           | 22                                                                                                                           |
| Detected mass range                                     | 14 – 275 m/z                                                                                                                 | 14 – 275 m/z                                                                                                                 | 14 – 275 m/z                                                                                                                 |
| Masses notched                                          | <sup>23</sup> Na <sup>+</sup> , <sup>30</sup> NO <sup>+</sup> , <sup>32</sup> O <sup>+</sup> , <sup>40</sup> Ar <sup>+</sup> | <sup>23</sup> Na <sup>+</sup> , <sup>30</sup> NO <sup>+</sup> , <sup>32</sup> O <sup>+</sup> , <sup>40</sup> Ar <sup>+</sup> | <sup>23</sup> Na <sup>+</sup> , <sup>30</sup> NO <sup>+</sup> , <sup>32</sup> O <sup>+</sup> , <sup>40</sup> Ar <sup>+</sup> |
| Data acquisition                                        | Continuous mode                                                                                                              | Continuous mode                                                                                                              | Continuous mode                                                                                                              |
| TOF integration time [ms]                               | 3                                                                                                                            | 3                                                                                                                            | 3                                                                                                                            |
| Transport efficiency [%]                                | 21.0                                                                                                                         | 20.5                                                                                                                         | 20.5                                                                                                                         |
| Oxides (CeO <sup>+</sup> /Ce <sup>+</sup> ) [%]         | 0.21                                                                                                                         | 0.26                                                                                                                         | 0.26                                                                                                                         |
| Doubly charged (Ba <sup>++</sup> /Ba <sup>+</sup> ) [%] | 0.90                                                                                                                         | 1.59                                                                                                                         | 1.59                                                                                                                         |

**Table S4.** Apex Omega desolvation unit operation parameters.

|                                           |      |
|-------------------------------------------|------|
| Argon flow rate [L·min <sup>-1</sup> ]    | 2.85 |
| Nitrogen flow rate [L·min <sup>-1</sup> ] | 0.0  |

|                                                             |       |
|-------------------------------------------------------------|-------|
| Peltier Cooler temperature [°C]                             | 3.3   |
| Spray Chamber temperature [°C]                              | 140.0 |
| Desolvator temperature [°C]                                 | 155.3 |
| Peristaltic pump speed [rpm]                                | 17.0  |
| Peristaltic pump flow [ $\mu\text{L}\cdot\text{min}^{-1}$ ] | 600.0 |

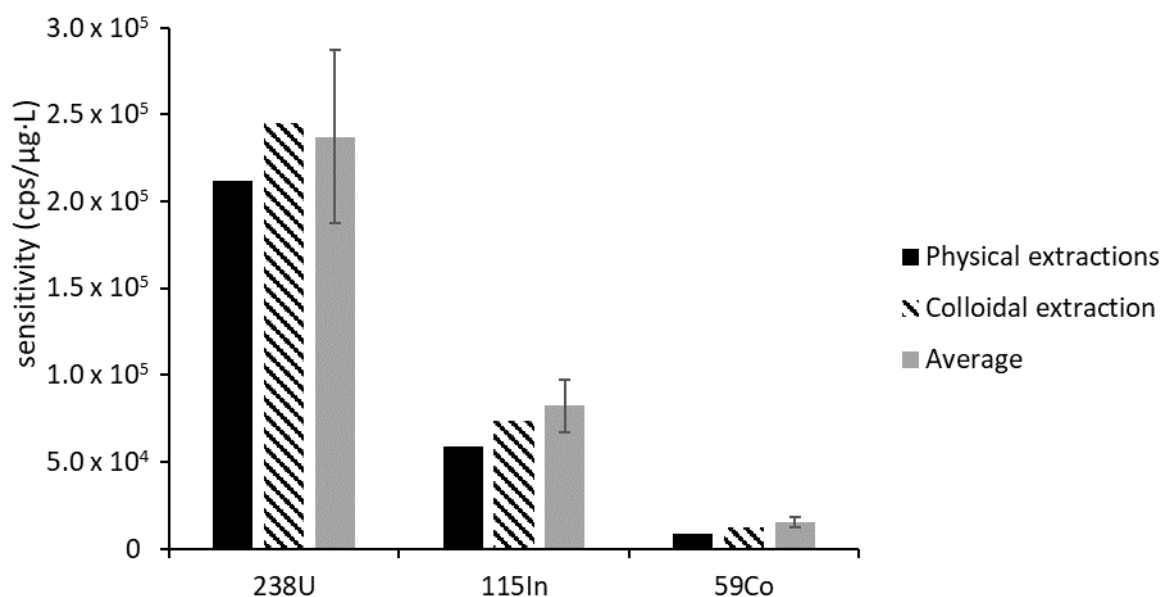

**Figure S1.** Sensitivity expressed as counts per second ( $\text{cps}/\mu\text{g}\cdot\text{L}^{-1}$ ). The black columns represent the sensitivities measured on the physical extractions measurement day, the dashed columns the sensitivities on the colloidal extraction measurement day, and the grey columns the average sensitivities achieved by the ICP-TOF-MS for 6 months.

**Table S5.** Limits of detection of the monitored analytes converted from concentration  $\text{LOD}_{\text{concentration}}$  ( $\text{ng}\cdot\text{L}^{-1}$ ) into mass  $\text{LOD}_{\text{mass}}$  (fg) and particle diameter  $\text{LOD}_{\text{diameter}}$  (nm) according to Pace et al. (2011) and Lee et al. (2014).  $\text{LOD}_{\text{diameter}}$  was determined assuming a pure particle and spherical shape.

| Analyte | Isotope | $\text{LOD}_{\text{concentration}}$ ( $\text{ng}\cdot\text{L}^{-1}$ ) | $\text{LOD}_{\text{mass}}$ (fg) | $\text{LOD}_{\text{diameter}}$ (nm) |
|---------|---------|-----------------------------------------------------------------------|---------------------------------|-------------------------------------|
| Na      | 23      | 271                                                                   | 0.834                           | 118                                 |
| Mg      | 24      | 80.3                                                                  | 0.250                           | 64.7                                |
| Al      | 27      | 181                                                                   | 0.557                           | 73.1                                |
| Si      | 28      | 74700                                                                 | 229                             | 573                                 |
| Ti      | 48      | 51.4                                                                  | 0.158                           | 40.6                                |
| V       | 51      | 19.1                                                                  | 0.0588                          | 27.3                                |
| Cr      | 52      | 55.9                                                                  | 0.172                           | 35.8                                |
| Mn      | 55      | 15.7                                                                  | 0.0484                          | 23.2                                |
| Fe      | 56      | 367                                                                   | 1.13                            | 64.9                                |
| Ni      | 58      | 24.9                                                                  | 0.0764                          | 25.4                                |
| Co      | 59      | 11.8                                                                  | 0.0364                          | 19.9                                |
| Cu      | 63      | 35.6                                                                  | 0.109                           | 28.6                                |
| Zn      | 64      | 18.4                                                                  | 0.0565                          | 24.7                                |
| As      | 75      | 20.7                                                                  | 0.0635                          | 27.7                                |
| Y       | 89      | 1.06                                                                  | 0.00327                         | 11.2                                |

|           |     |      |         |      |
|-----------|-----|------|---------|------|
| <b>Zr</b> | 90  | 5.59 | 0.0172  | 17.1 |
| <b>Mo</b> | 98  | 6.56 | 0.0202  | 15.6 |
| <b>Ru</b> | 102 | 9.51 | 0.0293  | 16.5 |
| <b>Rh</b> | 103 | 2.81 | 0.00865 | 11.0 |
| <b>Pd</b> | 106 | 9.61 | 0.0296  | 16.7 |
| <b>Ag</b> | 107 | 6.55 | 0.0201  | 15.4 |
| <b>Cd</b> | 114 | 4.88 | 0.0150  | 14.9 |
| <b>Sn</b> | 120 | 7.29 | 0.0224  | 18.1 |
| <b>Sb</b> | 121 | 14.6 | 0.0450  | 23.4 |
| <b>Te</b> | 130 | 82.2 | 0.253   | 42.6 |
| <b>Ba</b> | 138 | 15.1 | 0.0465  | 29.1 |
| <b>La</b> | 139 | 0.70 | 0.00217 | 8.77 |
| <b>Ce</b> | 140 | 1.95 | 0.00600 | 11.9 |
| <b>Pr</b> | 141 | 0.47 | 0.00145 | 7.43 |
| <b>Ir</b> | 193 | 2.02 | 0.00622 | 8.06 |
| <b>Pt</b> | 195 | 4.55 | 0.0140  | 10.8 |
| <b>Au</b> | 197 | 9.27 | 0.0385  | 14.1 |
| <b>Pb</b> | 208 | 3.09 | 0.00950 | 11.7 |
| <b>Bi</b> | 209 | 8.20 | 0.0252  | 17.0 |

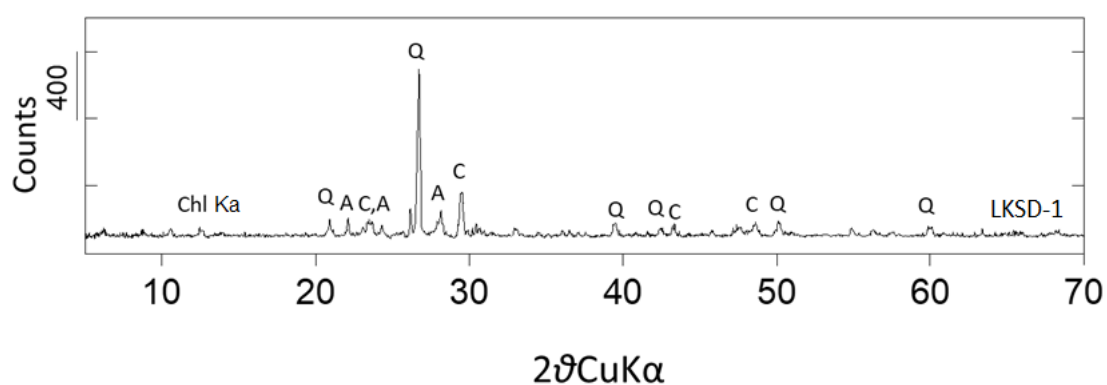

**Figure S2.** X-ray diffraction pattern of the sediment LKSD-1 sample. Chl: Chlorite; Ka: Kaolinite; Q: Quartz; A: Albite; C: Calcite.

**Table S6.** Total organic carbon (TOC), inorganic carbon (TIC), and total carbon (TC) content in the sediment sample.

|               | <b>TOC</b><br>(%) | <b>TIC</b><br>(%) | <b>TC</b><br>(%) |
|---------------|-------------------|-------------------|------------------|
| <b>LKSD-1</b> | 10.7              | 2.6               | 13.3             |

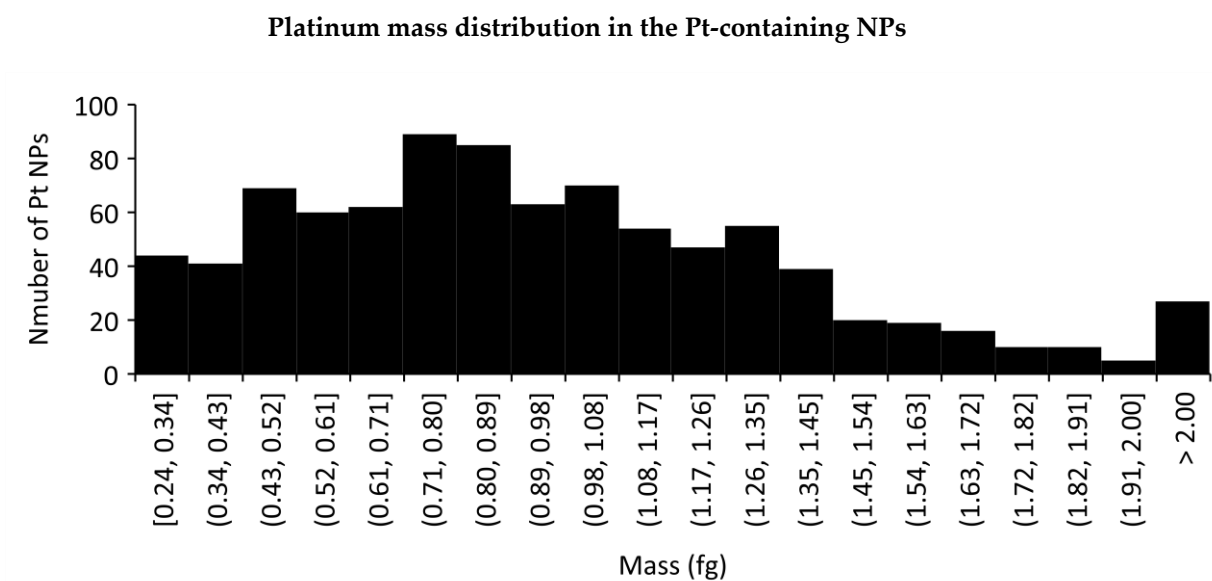

**Figure S3.** Pt mass distribution of Pt NPs in the undiluted spiking solution.

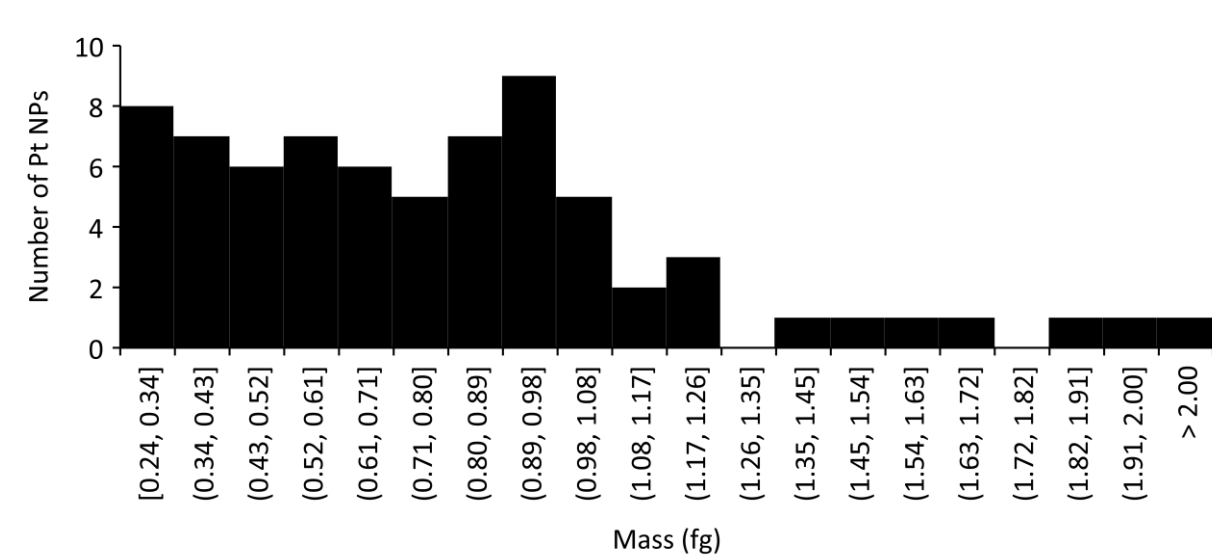

**Figure S4.** Pt mass distribution of Pt NPs in the spiking solution after centrifugation to a 1.5 µm cut-off, resuspension, and dilution by a factor of 200 in UPW.

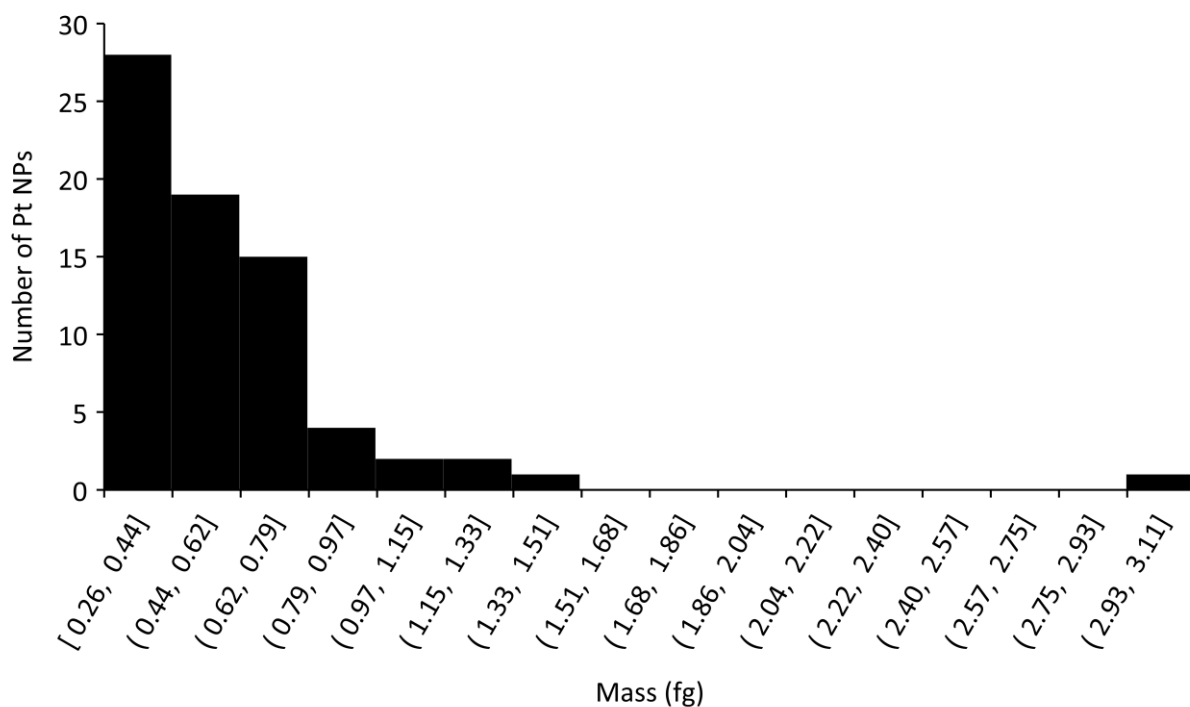

**Figure S5.** Pt mass distribution in the Pt NPs of the Pt-spiked sediment sample dispersion. The NPs were extracted by colloidal extraction, dispersed in FL70, and acquired over 1 minute.

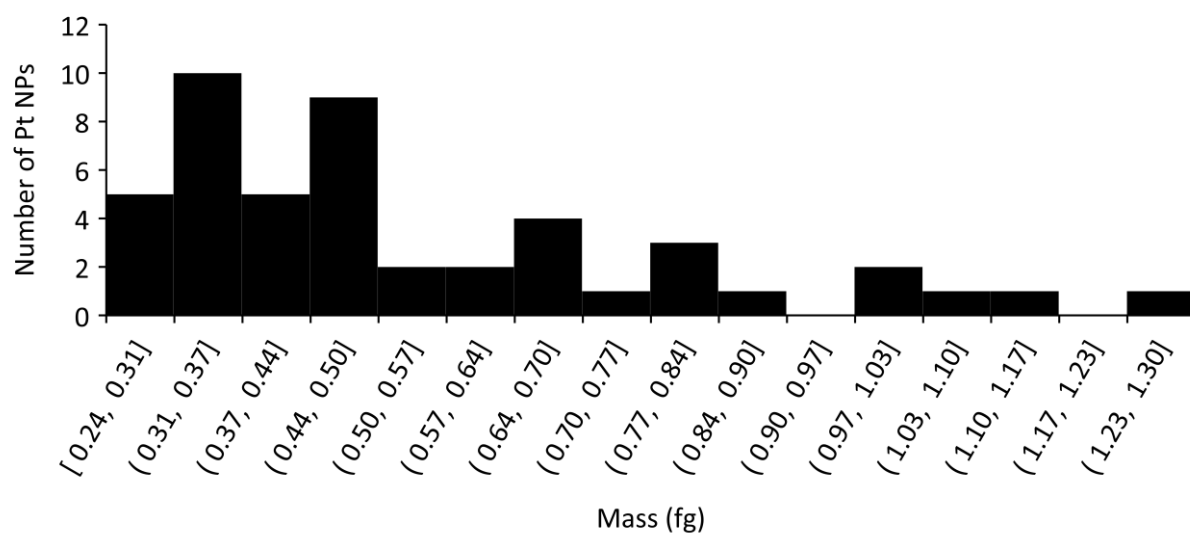

**Figure S6.** Pt mass distribution in the Pt NPs of the Pt-spiked sediment sample dispersion. The NPs were extracted by physical one-step extraction, dispersed in FL70, and acquired over 1 minute.

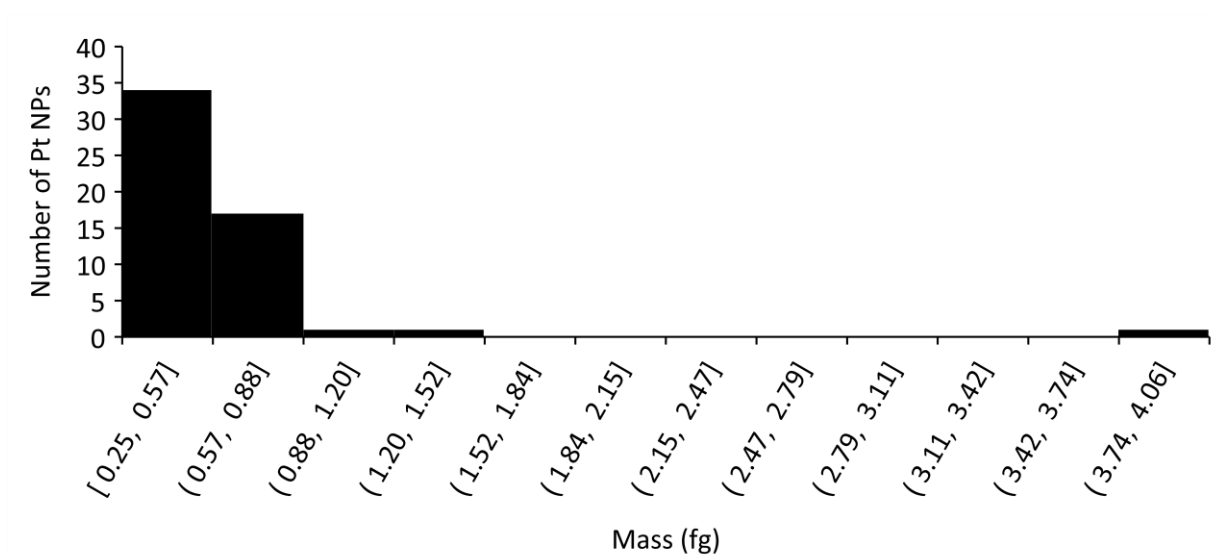

**Figure S7.** Pt mass distribution in the Pt NPs of the Pt-spiked sediment sample dispersion. The NPs were extracted by physical two-step extraction, dispersed in FL70, and acquired over 1 min.

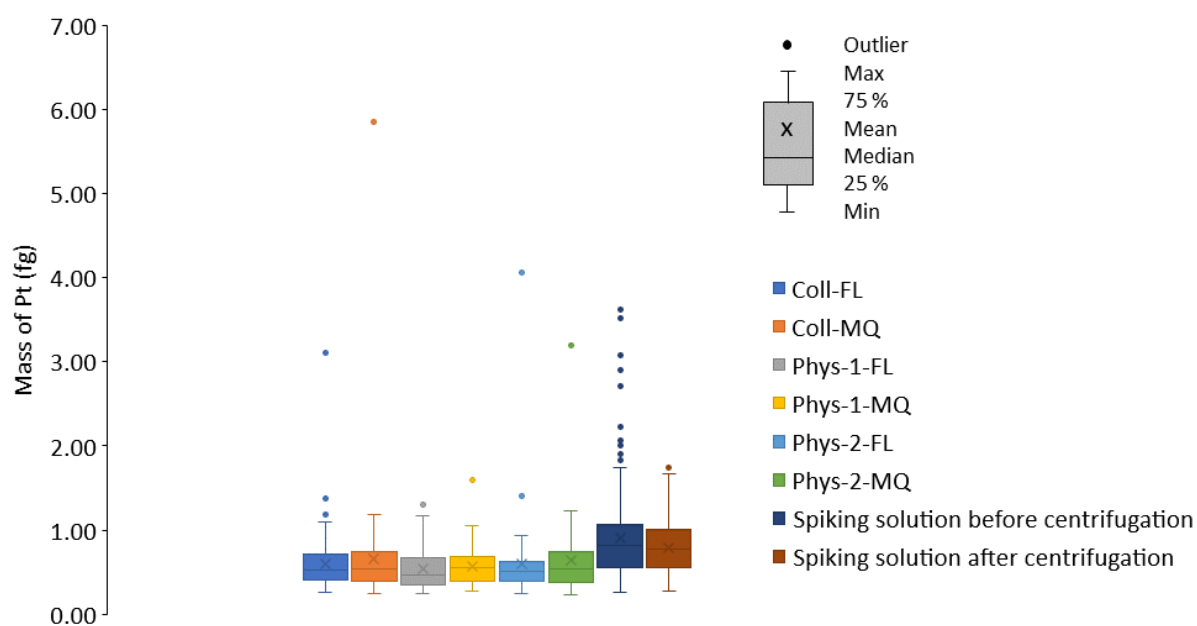

**Figure S8.** Summary of the mass distribution of Pt in the Pt NPs of the Pt-spiked sediment samples of each extraction procedure and the Pt NPs spiking solution before and after centrifugation.

**Table S7.** Dissolved ions concentration represented as counts per second (cps) of selected major elements in the pristine sediment sample following particle extraction for each extraction procedure. The samples were dispersed in FL70.

|                              | Aluminum           | Calcium            | Iron               | Magnesium          |
|------------------------------|--------------------|--------------------|--------------------|--------------------|
| Physical one-step extraction | $7.53 \times 10^4$ | $2.25 \times 10^5$ | $1.67 \times 10^5$ | $1.73 \times 10^5$ |
| Physical two-step extraction | $9.88 \times 10^4$ | $1.95 \times 10^5$ | $1.96 \times 10^5$ | $7.47 \times 10^4$ |
| Colloidal extraction         | $1.12 \times 10^5$ | $1.47 \times 10^5$ | $3.14 \times 10^5$ | $1.35 \times 10^5$ |

**Elemental composition of Pt-containing nanoparticles in the Pt-spiked sediment samples**

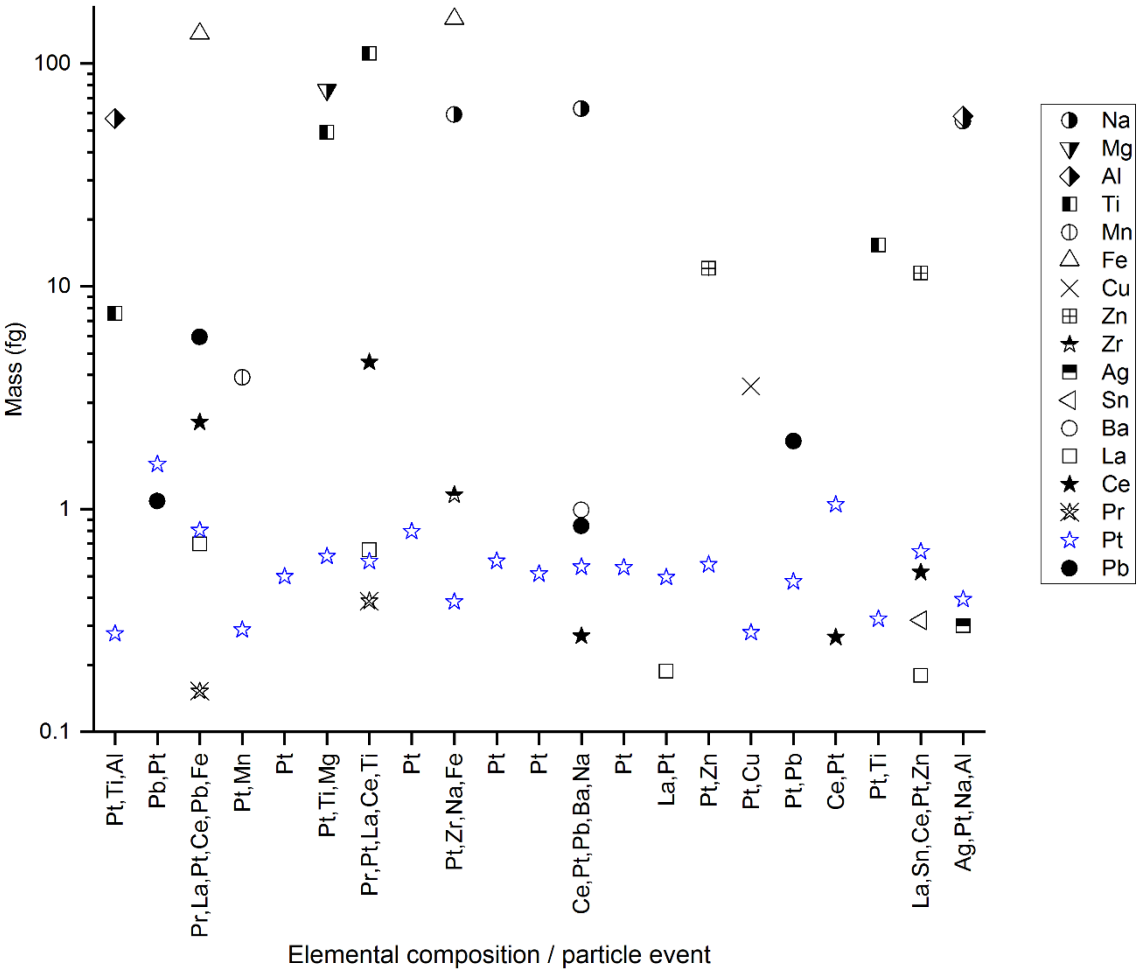

**Figure S9.** Pt-containing NP elemental compositions in the Pt-spiked sediment sample dispersion. The NPs were extracted by physical one-step extraction, dispersed in UPW, and acquired over 30 seconds out of 1 minute total acquisition time. The *y*-axis indicates the mass of each element and the *x*-axis the elemental composition.



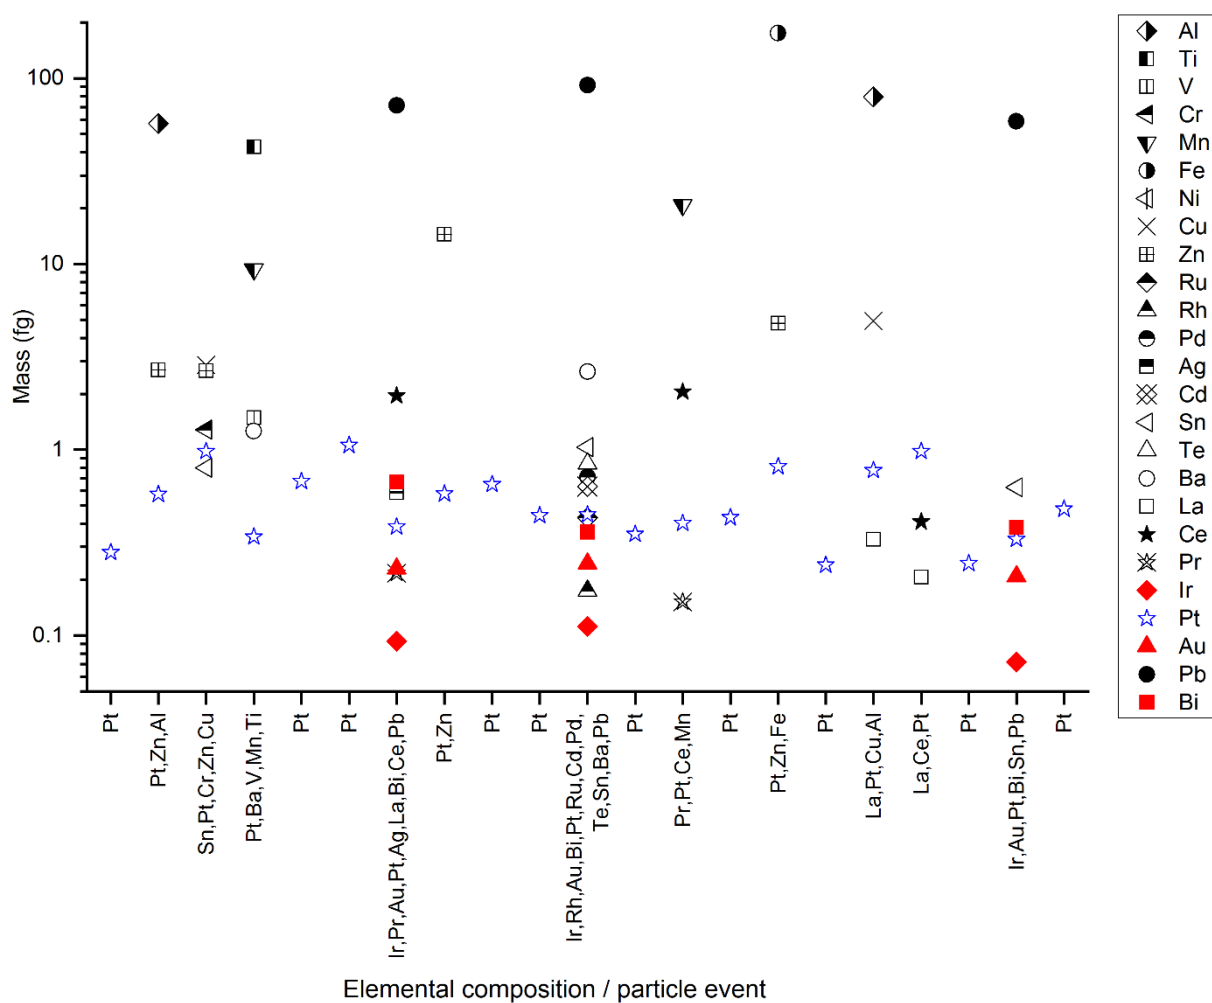

**Figure S10.** Pt-containing NP elemental compositions in the Pt-spiked sediment sample dispersion. The NPs were extracted by physical one-step extraction, dispersed in FL70, and acquired over 30 seconds out of 1 minute total acquisition time. The y-axis indicates the mass of each element and the x-axis the elemental composition.

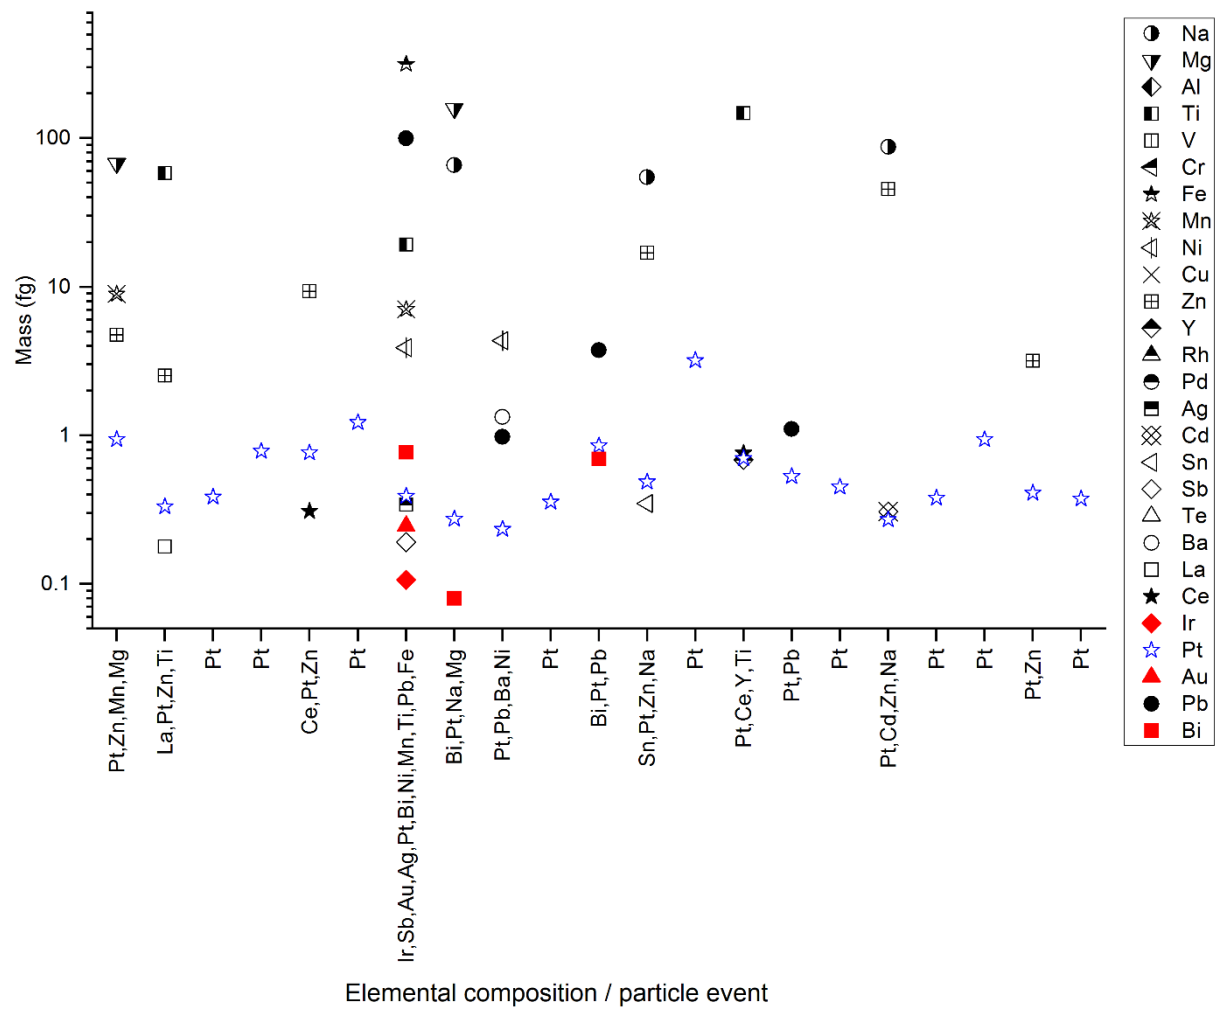

**Figure S11.** Pt-containing NP elemental compositions in the Pt-spiked sediment sample dispersion. The NPs were extracted by physical two-step extraction, dispersed in UPW, and acquired over 30 seconds out of 1 minute total acquisition time. The y-axis indicates the mass of each element and the x-axis the elemental composition.

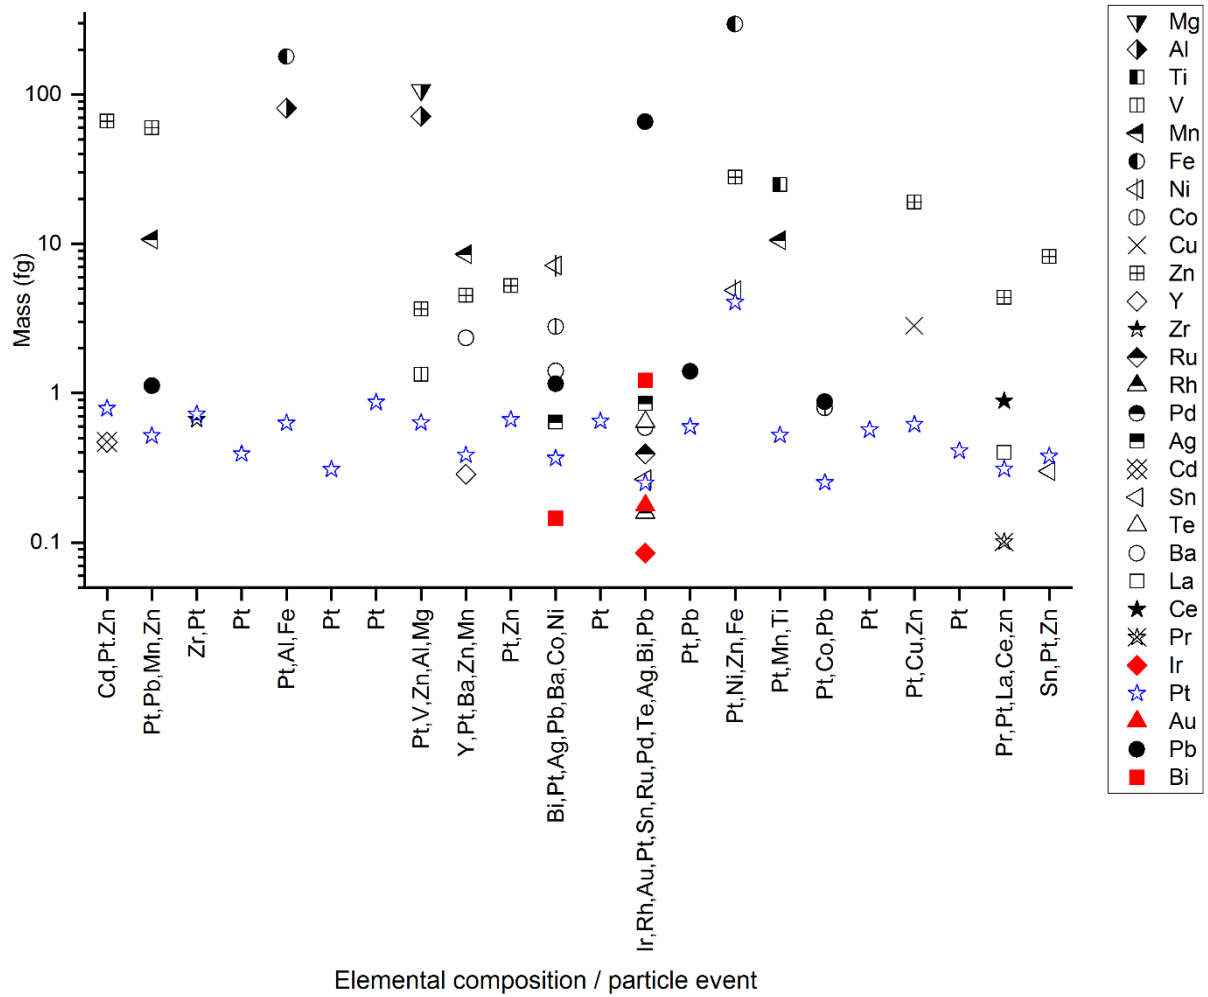

**Figure S12.** Pt-containing NP elemental compositions in the Pt-spiked sediment sample dispersion. The NPs were extracted by physical two-step extraction, dispersed in FL70, and acquired over 30 seconds out of 1 minute total acquisition time. The *y*-axis indicates the mass of each element and the *x*-axis the elemental composition.

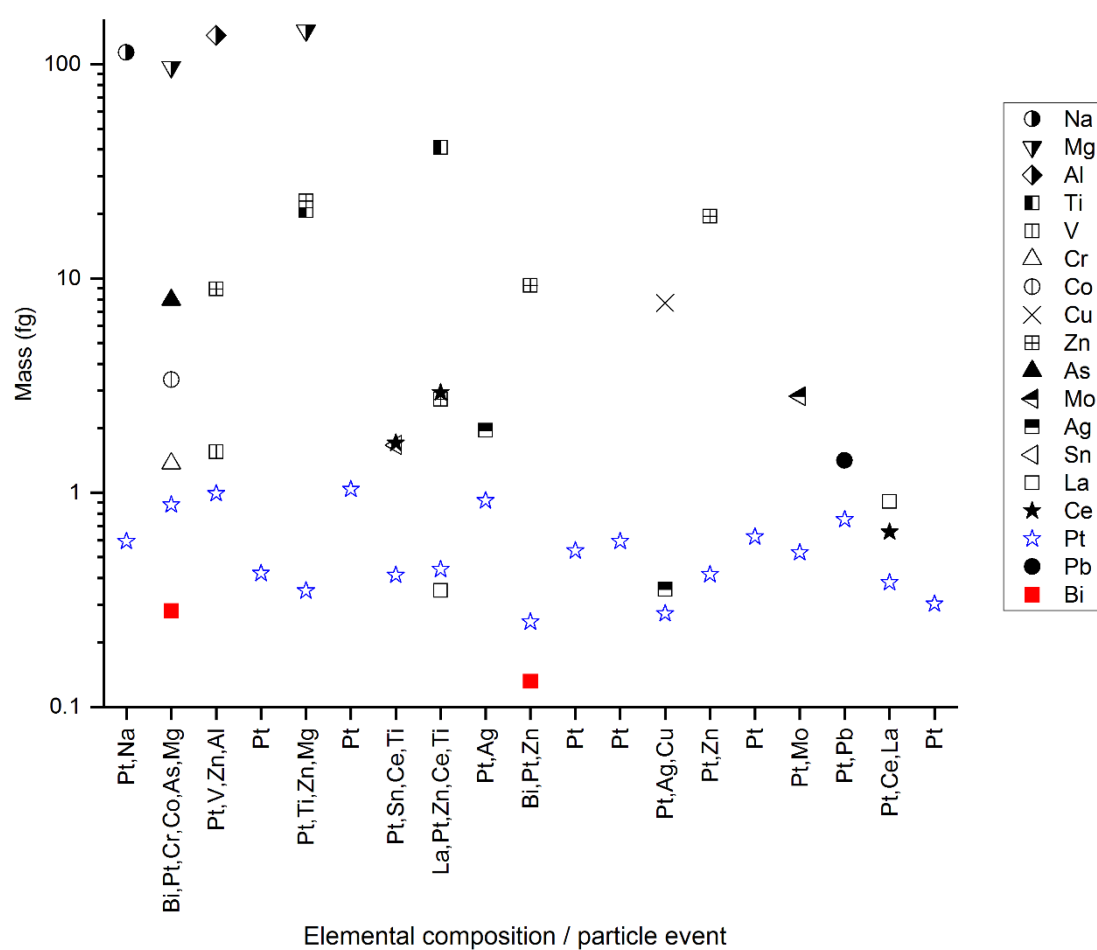

**Figure S13.** Pt-containing NP elemental compositions in the Pt-spiked sediment sample dispersion. The NPs were extracted by colloidal extraction, dispersed in UPW, and acquired over 30 seconds out of 1 minute total acquisition time. The  $y$ -axis indicates the mass of each element and the  $x$ -axis the elemental composition.

### Temporal investigation of Pt nanoparticle recoveries

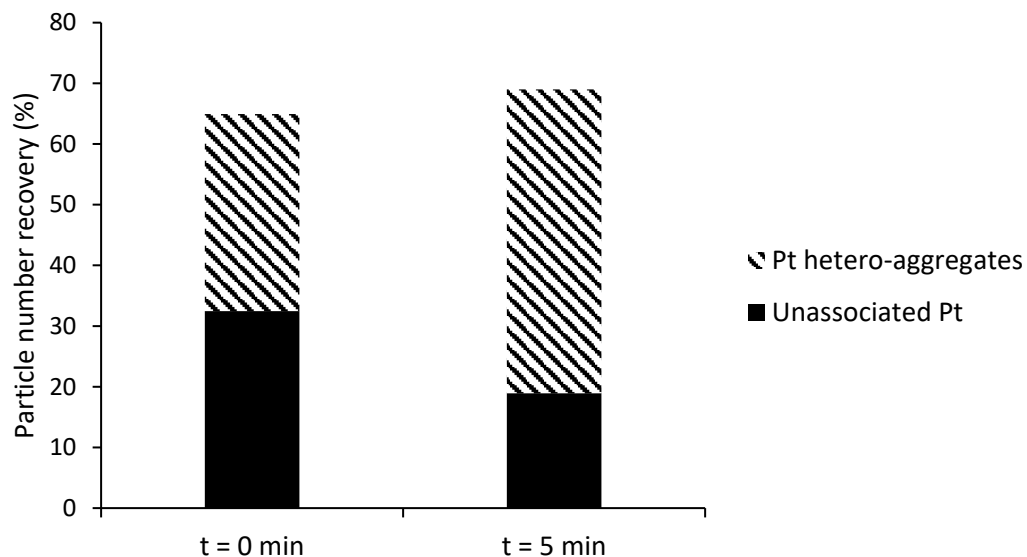

**Figure S14.** Particle number recoveries (#%) of spiked Pt NPs from sediment samples, as single un-associated Pt NPs (black columns) and as Pt NPs hetero-aggregated with other sediment particles (dashed columns), at t = 0 min and t = 5 min after sample redispersion (shaking and sonication). The NPs were extracted by physical one-step extraction and dispersed in FL70 prior to ICP-TOF-MS analysis.
